# Supplementary material for: Flexible hybrid carbon nanotube sponges embedded with SnS2 from tubular nanosheaths to nanosheets as free-standing anodes for lithium-ion batteries
Source: Royal Society of Chemistry journal article supplement (doi:10.1039/c6ra01143h), 2016-01-01
Supplement: c6ra01143h1.pdf [file c6ra01143h1.pdf]

# Supporting information

## Flexible Hybrid Carbon Nanotube Sponges Embedded with SnS<sub>2</sub> from Tubular Nanosheaths to Nanosheets as Free-Standing Anodes for Lithium-Ion Battery

Zhimin Ma,<sup>a</sup> Yunsong Wang,<sup>a</sup> Yanbing Yang,<sup>ab</sup> Muhammad Yousaf,<sup>a</sup> Mingchu Zou,<sup>a</sup> Anyuan Cao<sup>\*a</sup> and Ray P.S. Han<sup>\*a</sup>

<sup>a</sup>Department of Materials Science and Engineering, College of Engineering, Peking University, Beijing 100871, China. E-mail: ray-han@pku.edu.cn, anyuan@pku.edu.cn

<sup>b</sup>Key Laboratory of Analytical Chemistry for Biology and Medicine (Ministry of Education), College of Chemistry and Molecular Sciences, Wuhan University, Wuhan 430072, China.

Fig. S1

Fig. S2

Fig. S3

Fig. S4

Fig. S5

Fig. S6

Fig. S7

Fig. S8

Fig. S9

Fig. S10

Fig. S11

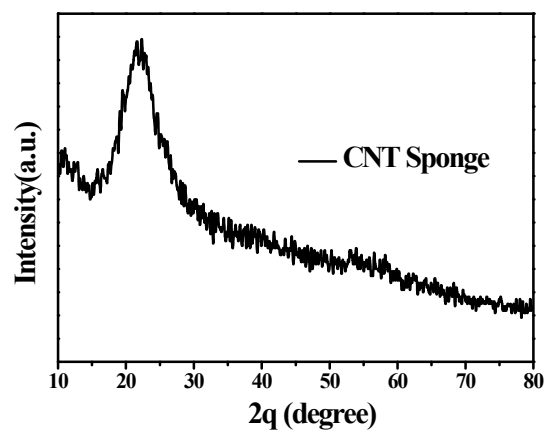

Fig. S1 XRD pattern of the CNT Sponge.

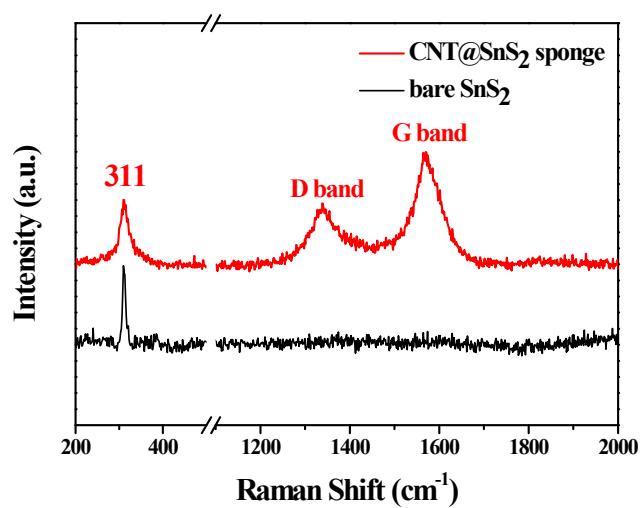

Fig. S2 Raman pattern of the CNT@SnS<sub>2</sub> sponge and pure SnS<sub>2</sub>.

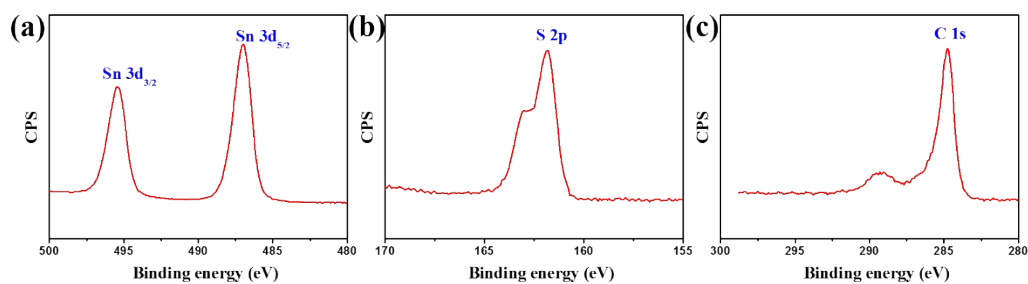

Fig. S3 High-resolution XPS spectra of the CNT@SnS<sub>2</sub> sponge: (a) Sn 3d; (b) S 2p; (c) C 1s.

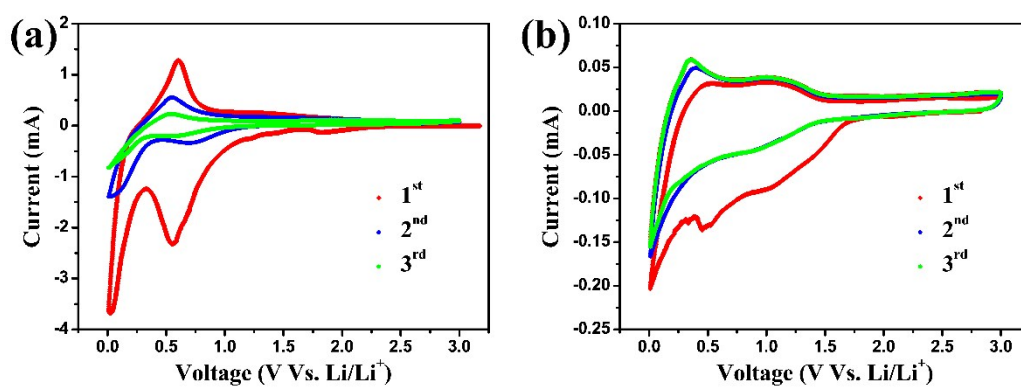

Fig. S4 Cyclic voltammograms of bare SnS<sub>2</sub> (a) and CNT sponge (b) electrodes.

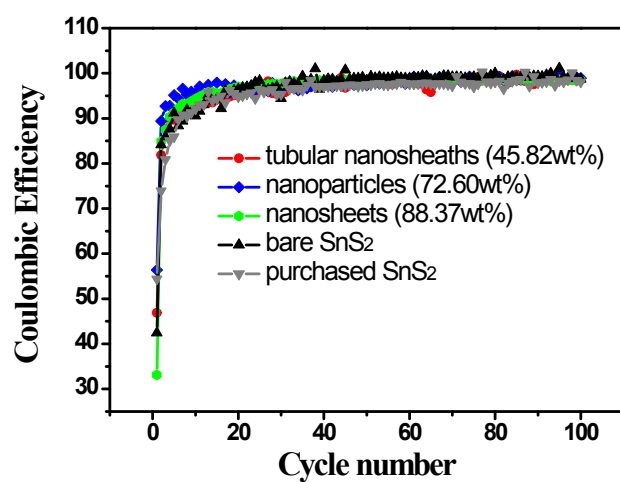

Fig. S5 Coulombic efficiencies of various SnS<sub>2</sub> electrodes.

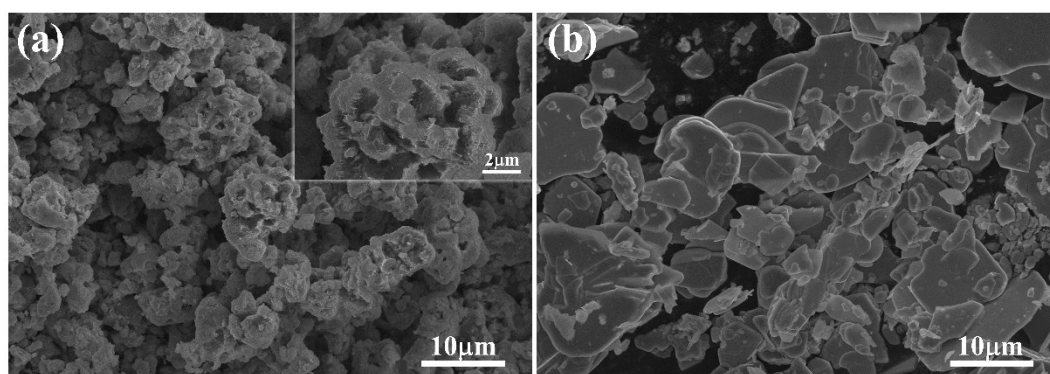

Fig. S6 SEM images of bare SnS<sub>2</sub> (a) and purchased SnS<sub>2</sub> (b) powder. It can be seen that bare SnS<sub>2</sub> prepared by our method agglomerated much greater than purchased SnS<sub>2</sub> dispersed as relatively uniform plate crystals.

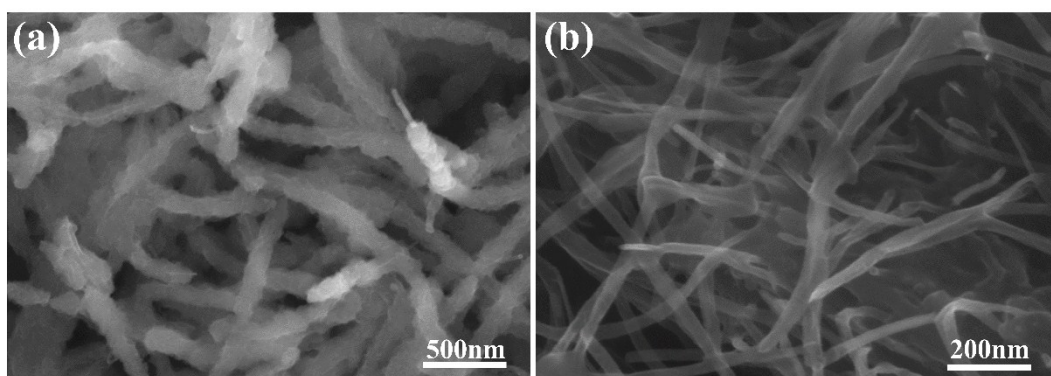

Fig.

S7 SEM images of CNT@SnS<sub>2</sub>-88.37wt% (a) and CNT@SnS<sub>2</sub>-45.82wt% (b) sponge electrodes under absolutely charged state.

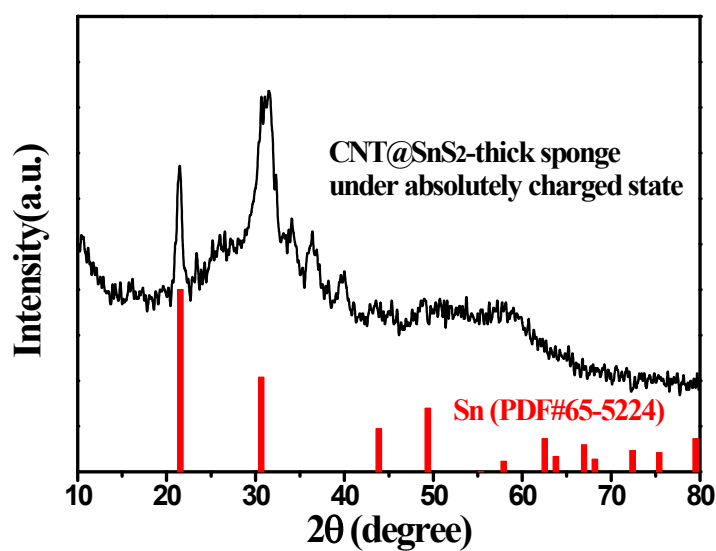

Fig. S8 XRD pattern of the CNT@SnS<sub>2</sub>-88.37wt% sponge after the electrode were taken to the absolutely charged state.

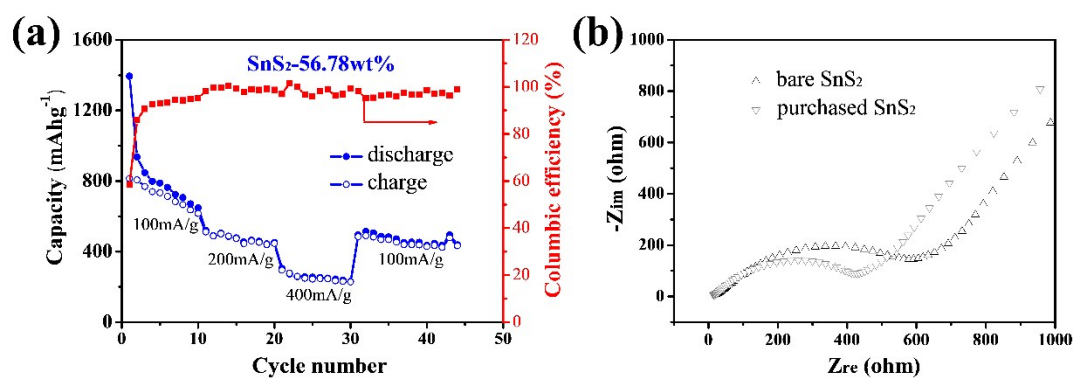

**Fig. S9** (a) Rate capability and Coulombic efficiency of  $\text{SnS}_2$ -56.78wt% embedded in CNT sponge under shifty charge/discharge rates between 100 and 400  $\text{mA g}^{-1}$ . (b) Nyquist plots of bare and purchased  $\text{SnS}_2$  electrodes.

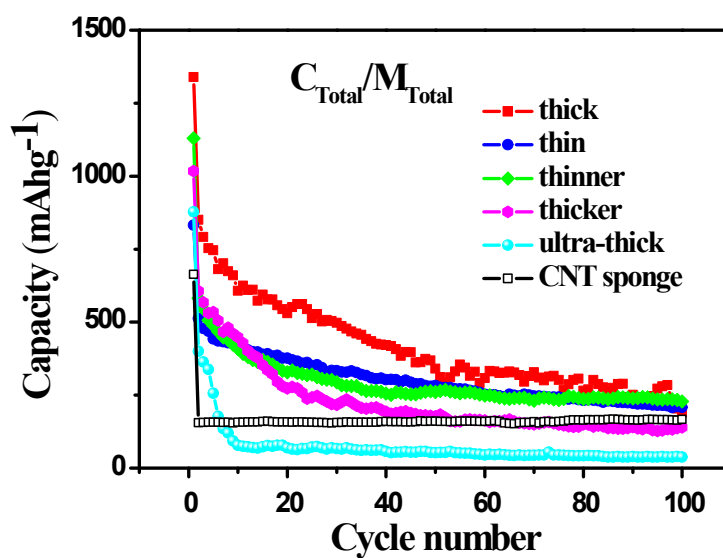

**Fig. S10** Cycling performance of the sponges with various ratios of  $\text{SnS}_2$  as free-standing electrodes

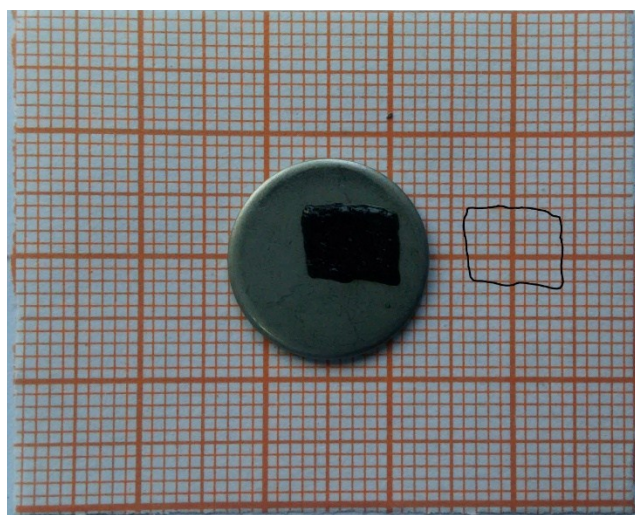

**Fig. S11** Photo to show the area calculation of the electrode and the area is 0.46  $\text{cm}^2$ .
